# Supplementary material
Source: PubMed Central journal article supplement (PMC8438621)

## Supplementary Online Content

Gu W, Rauschecker AM, Hsu E, et al. Detection of neoplasms by metagenomic next-generation sequencing of cerebrospinal fluid. *JAMA Neurol*. Published online September 13, 2021. doi:10.1001/jamaneurol.2021.3088

**eTable.** Study 1 Samples: Correlated Body Fluid and Cancer Tissue Copy Ratio Plots

This supplementary material has been provided by the authors to give readers additional information about their work.

**eTable. Study 1 Samples: Correlated Body Fluid and Cancer Tissue Copy Ratio Plots**

Sample 1

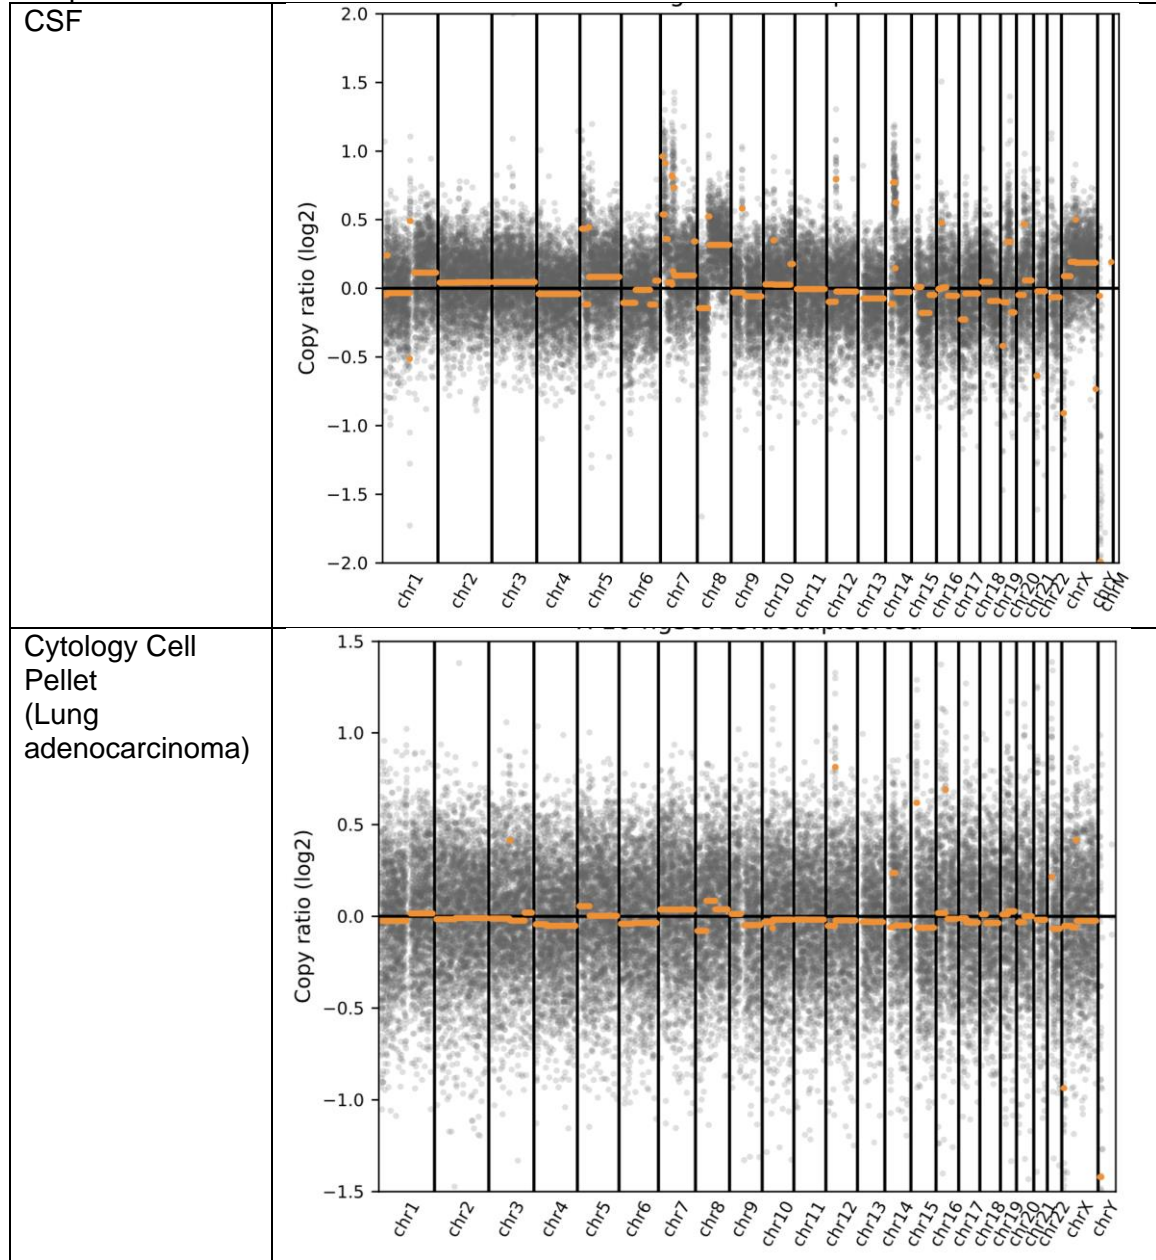

Sample 21

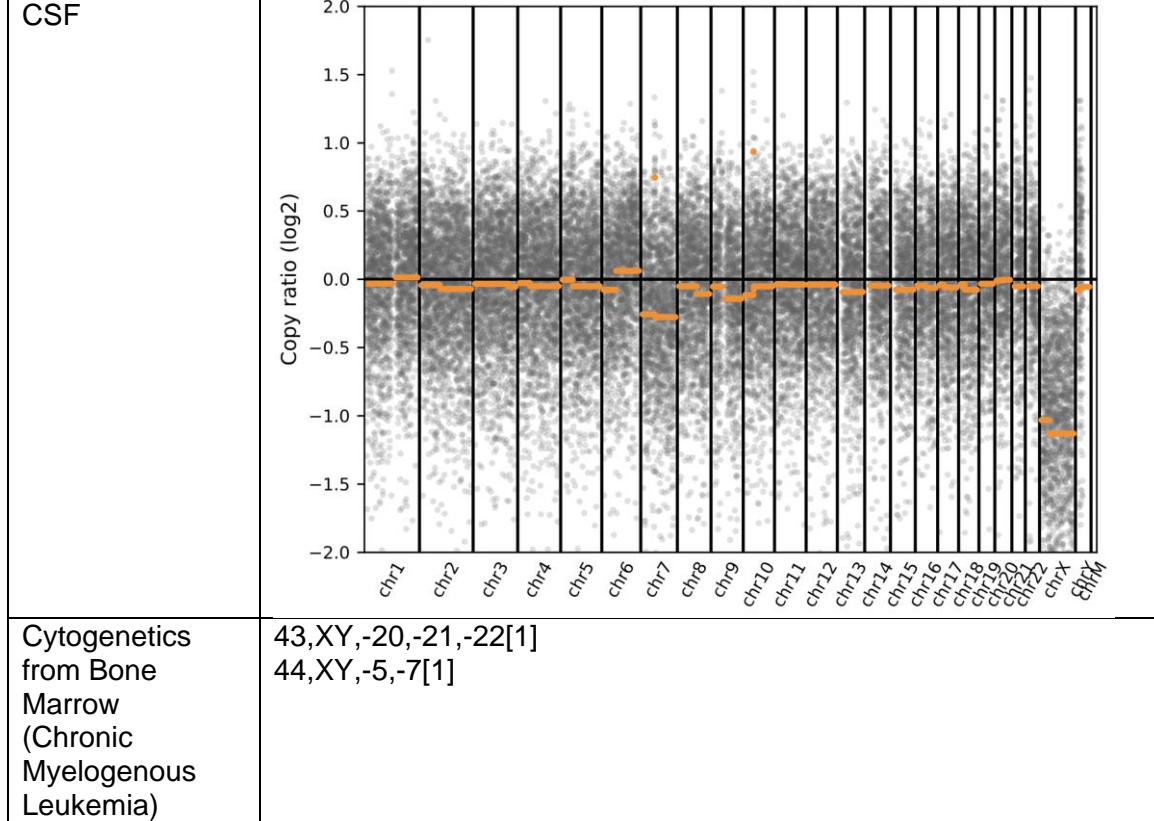

Sample 32  
CSF

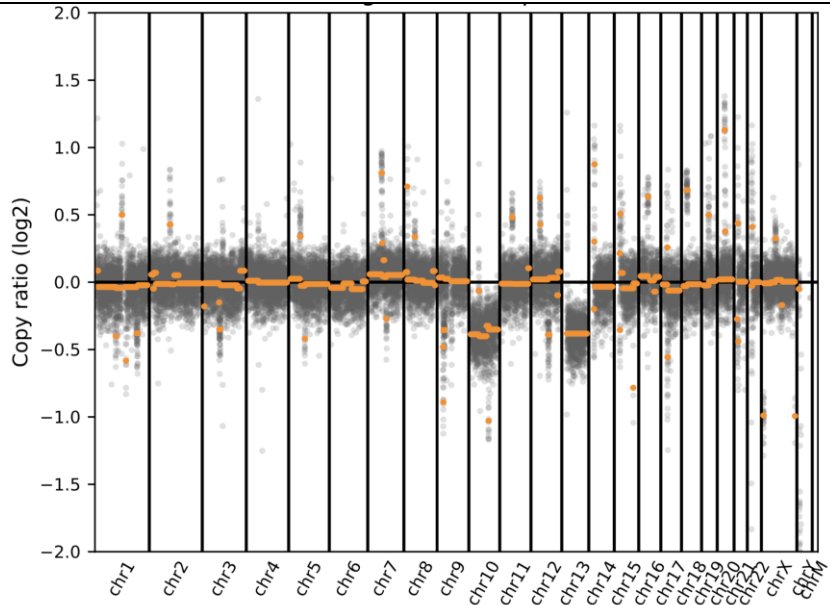

Cancer tissue from  
Brain biopsy  
(Glioblastoma,  
grade IV)

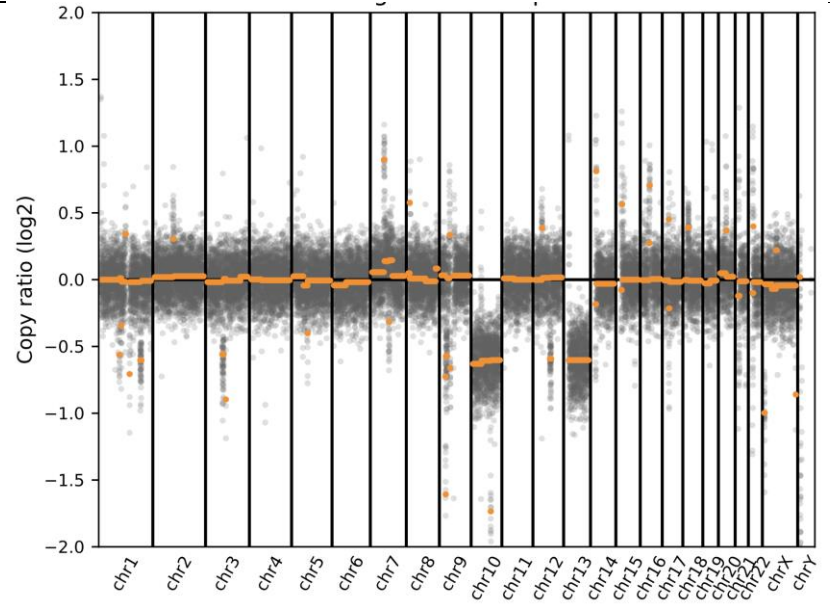

Sample 34

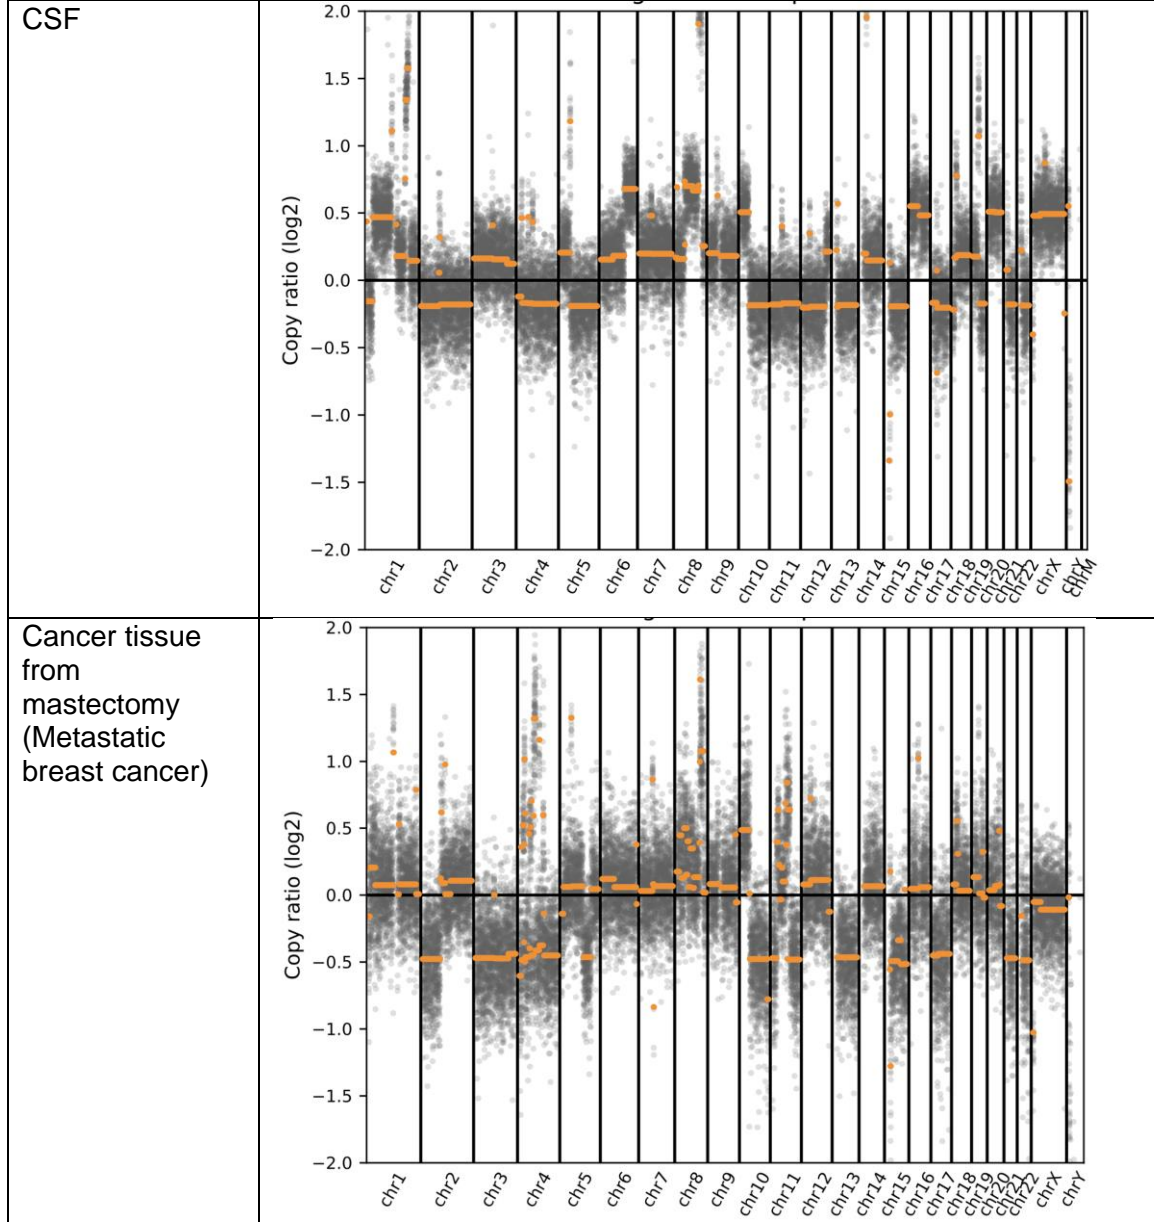

Sample 36  
CSF

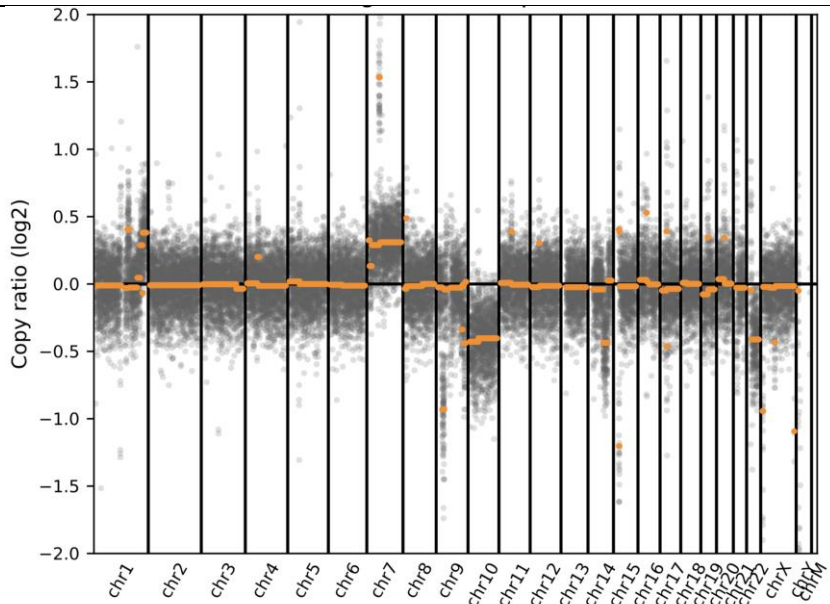

Cancer tissue from  
Brain biopsy  
(Glioblastoma,  
grade IV)

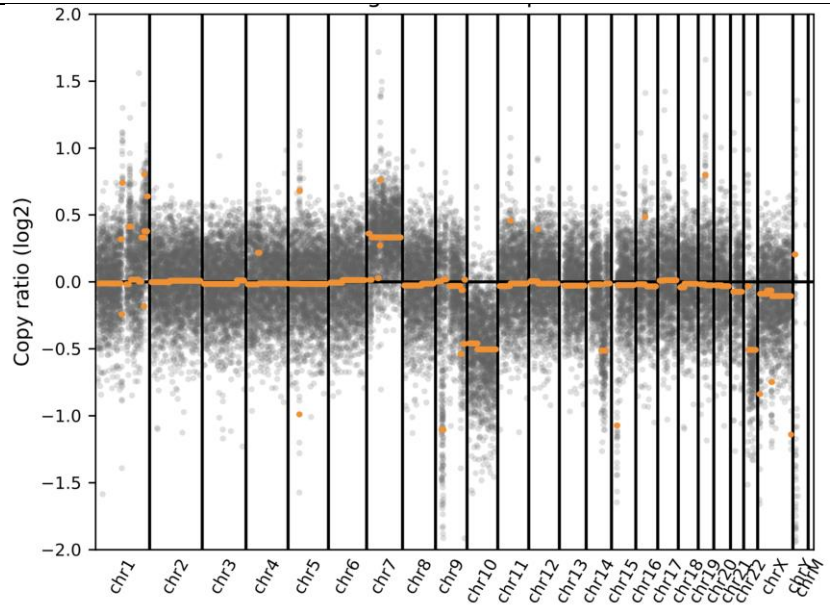

Sample 40

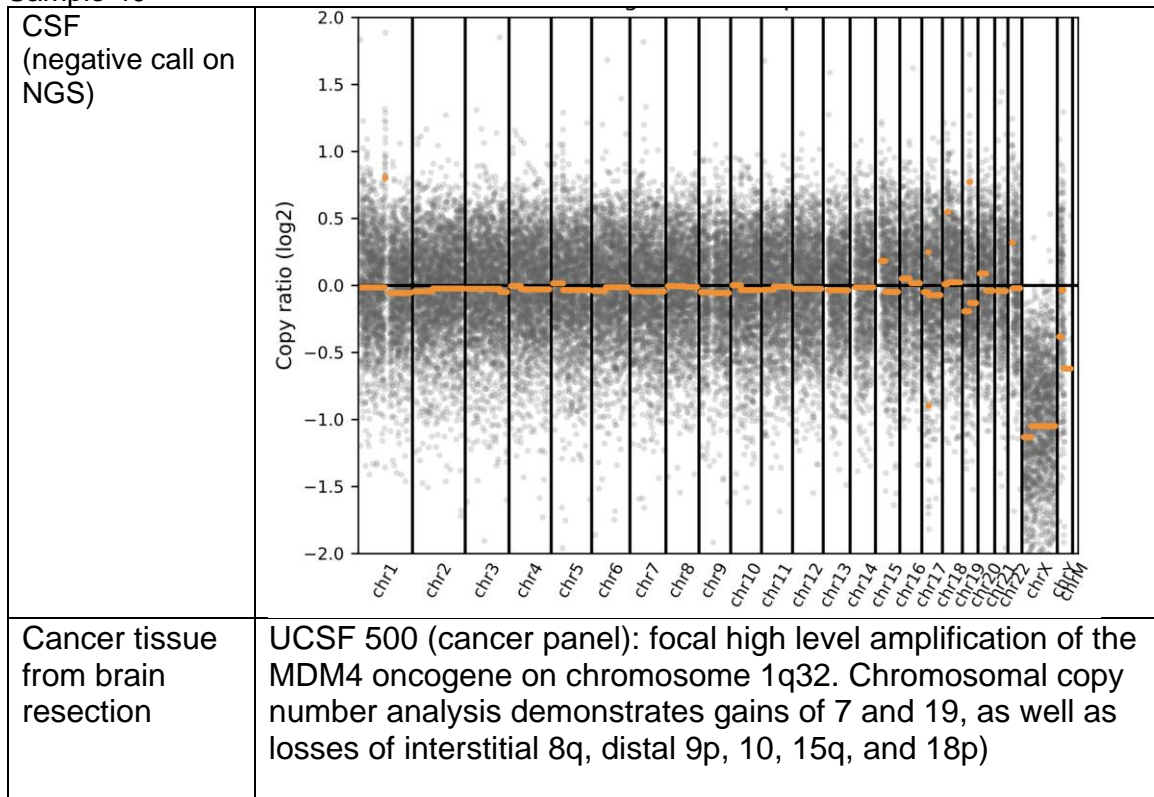

Sample 8

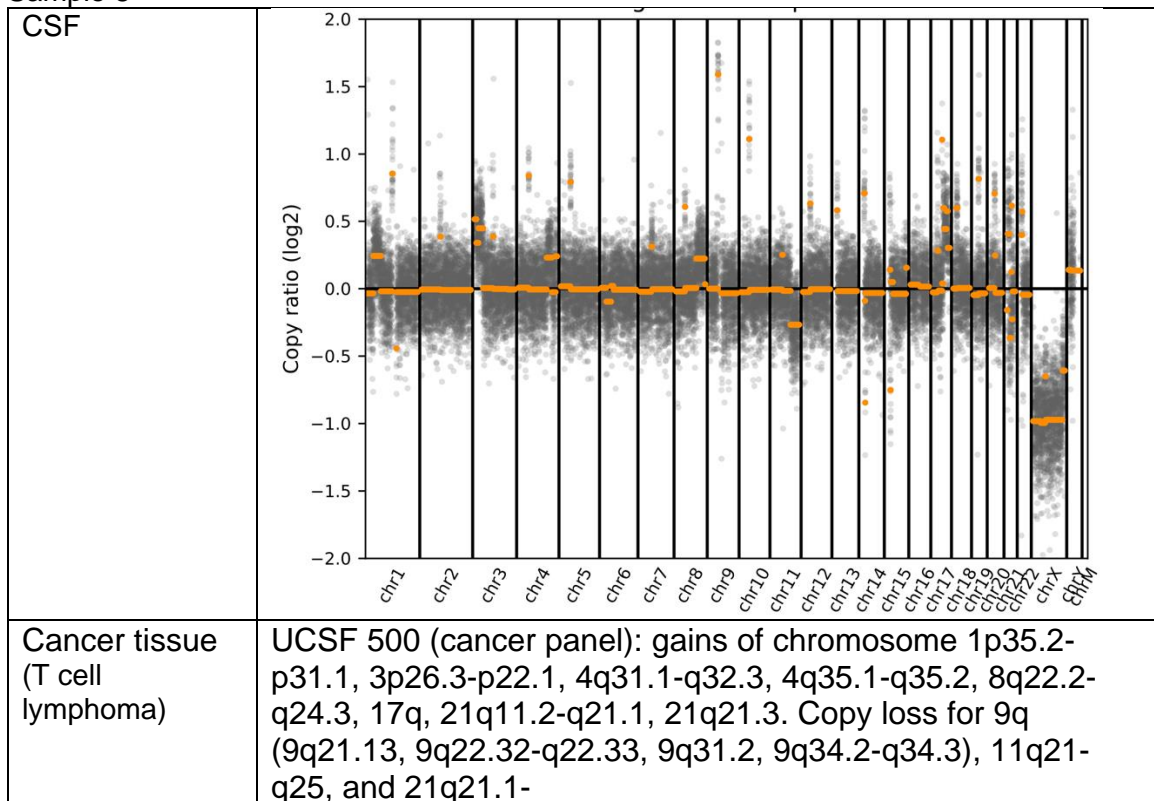



q21.2, 21q22.11.

Sample 45

CSF  
(Negative call on NGS. Given the tissue correlation data, this false negative was likely due to low tumor fraction in the CSF)

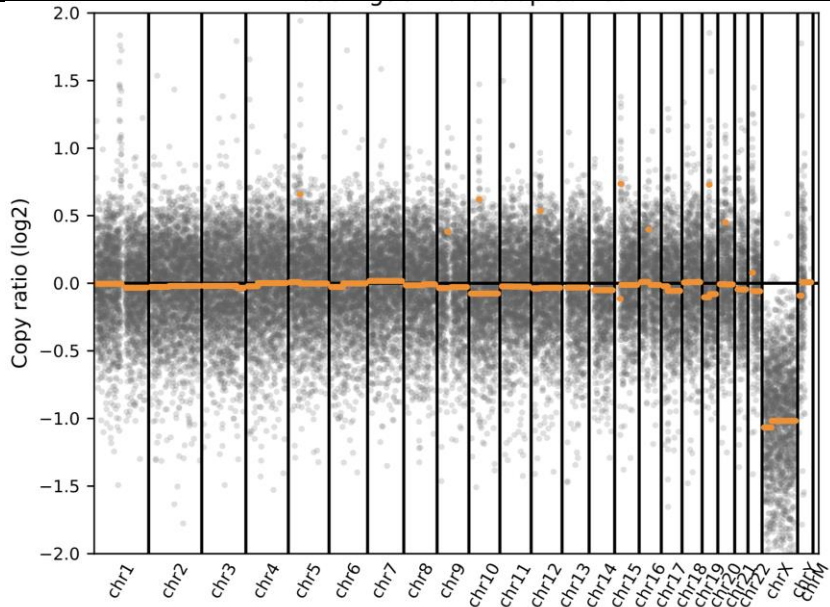

Cancer tissue from  
Brain biopsy  
(Glioblastoma,  
grade IV)

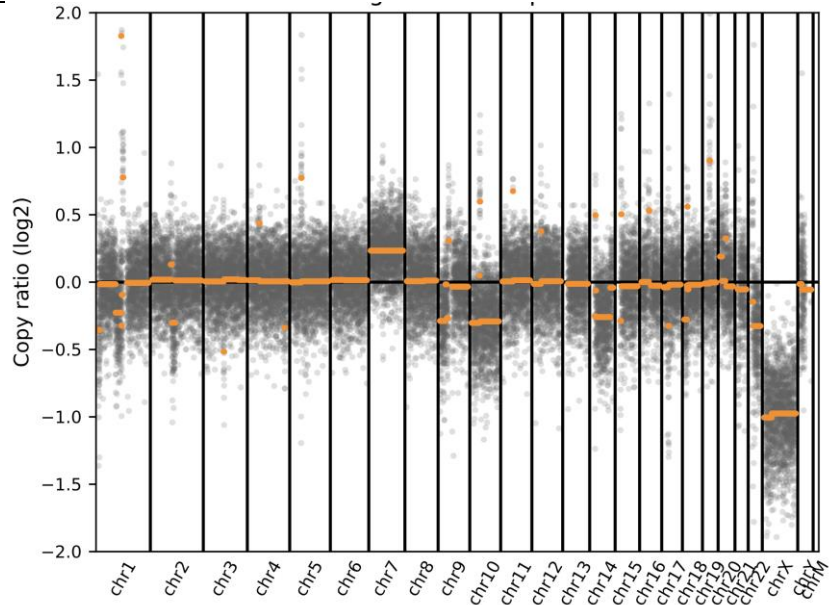



Sample 46

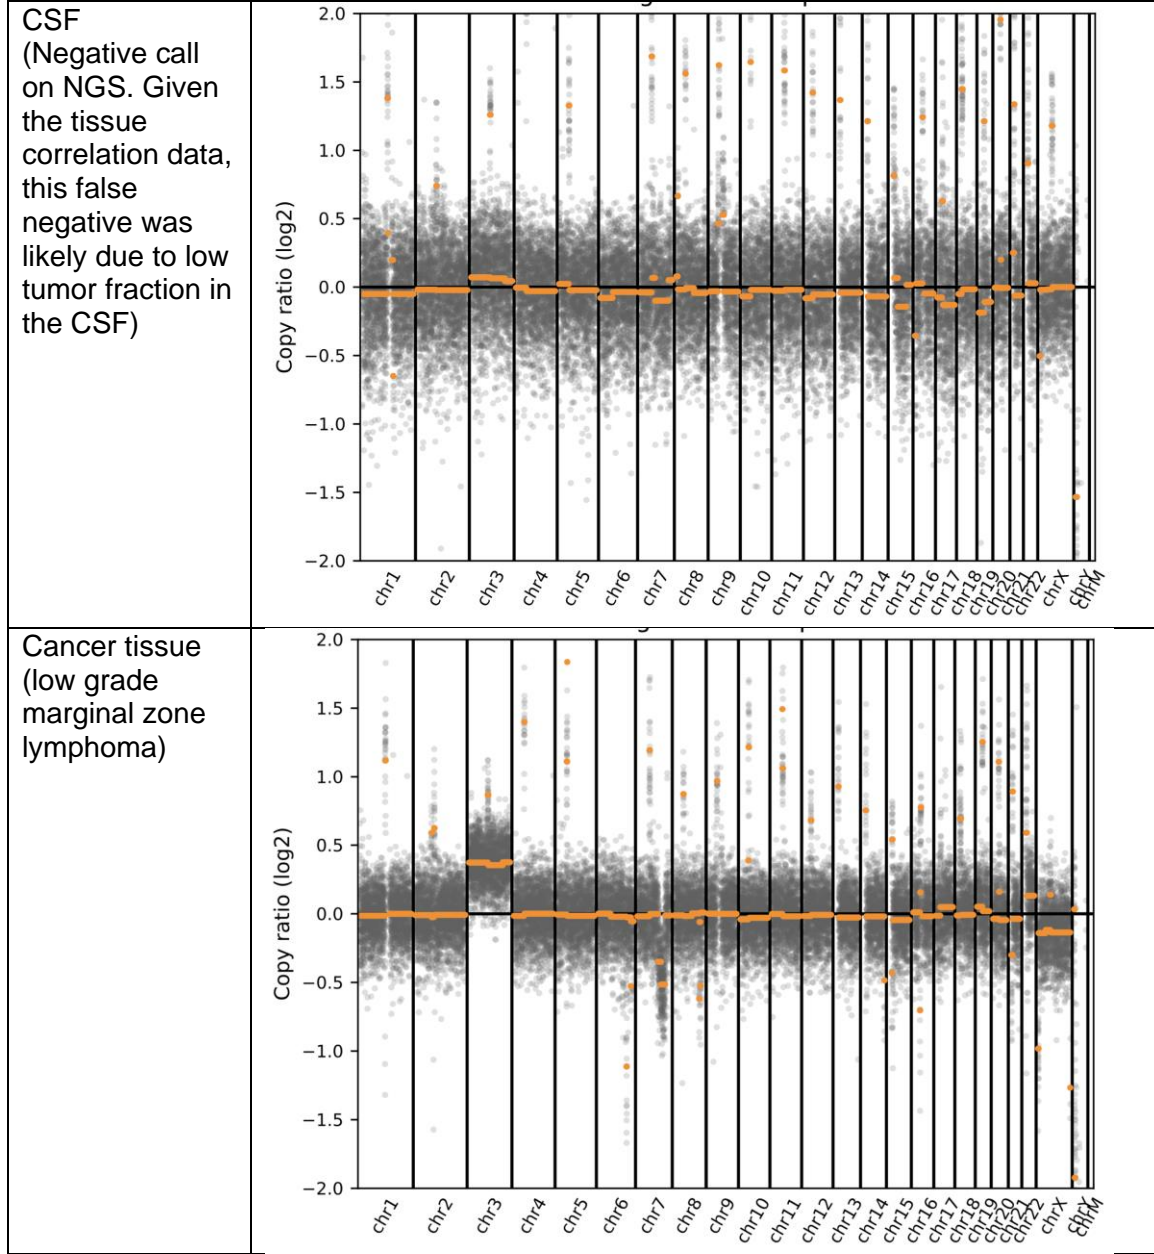

Sample 48  
CSF

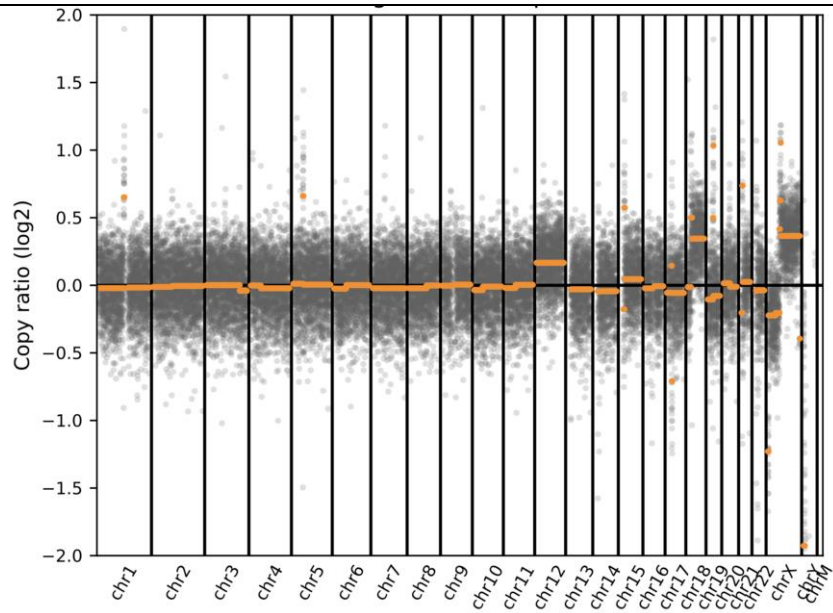

Cancer tissue  
(large B-cell  
lymphoma)

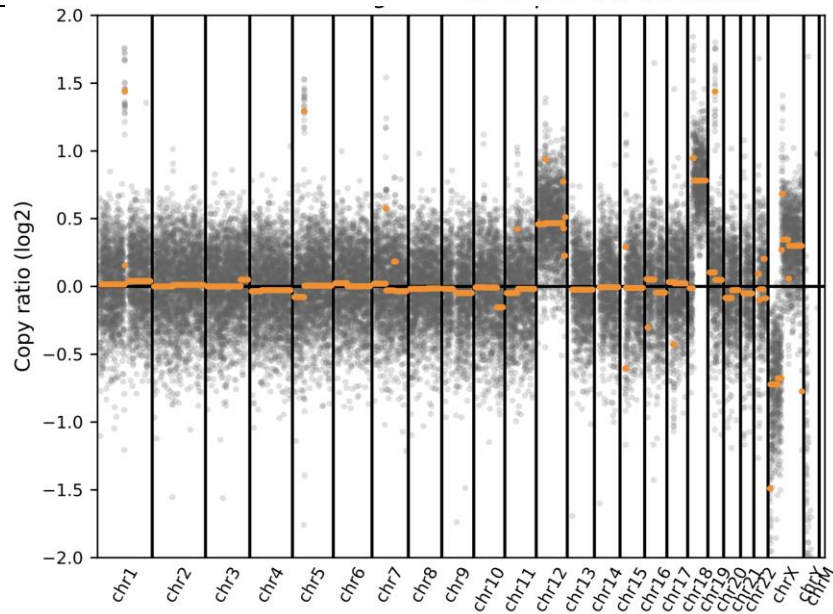

Sample 129

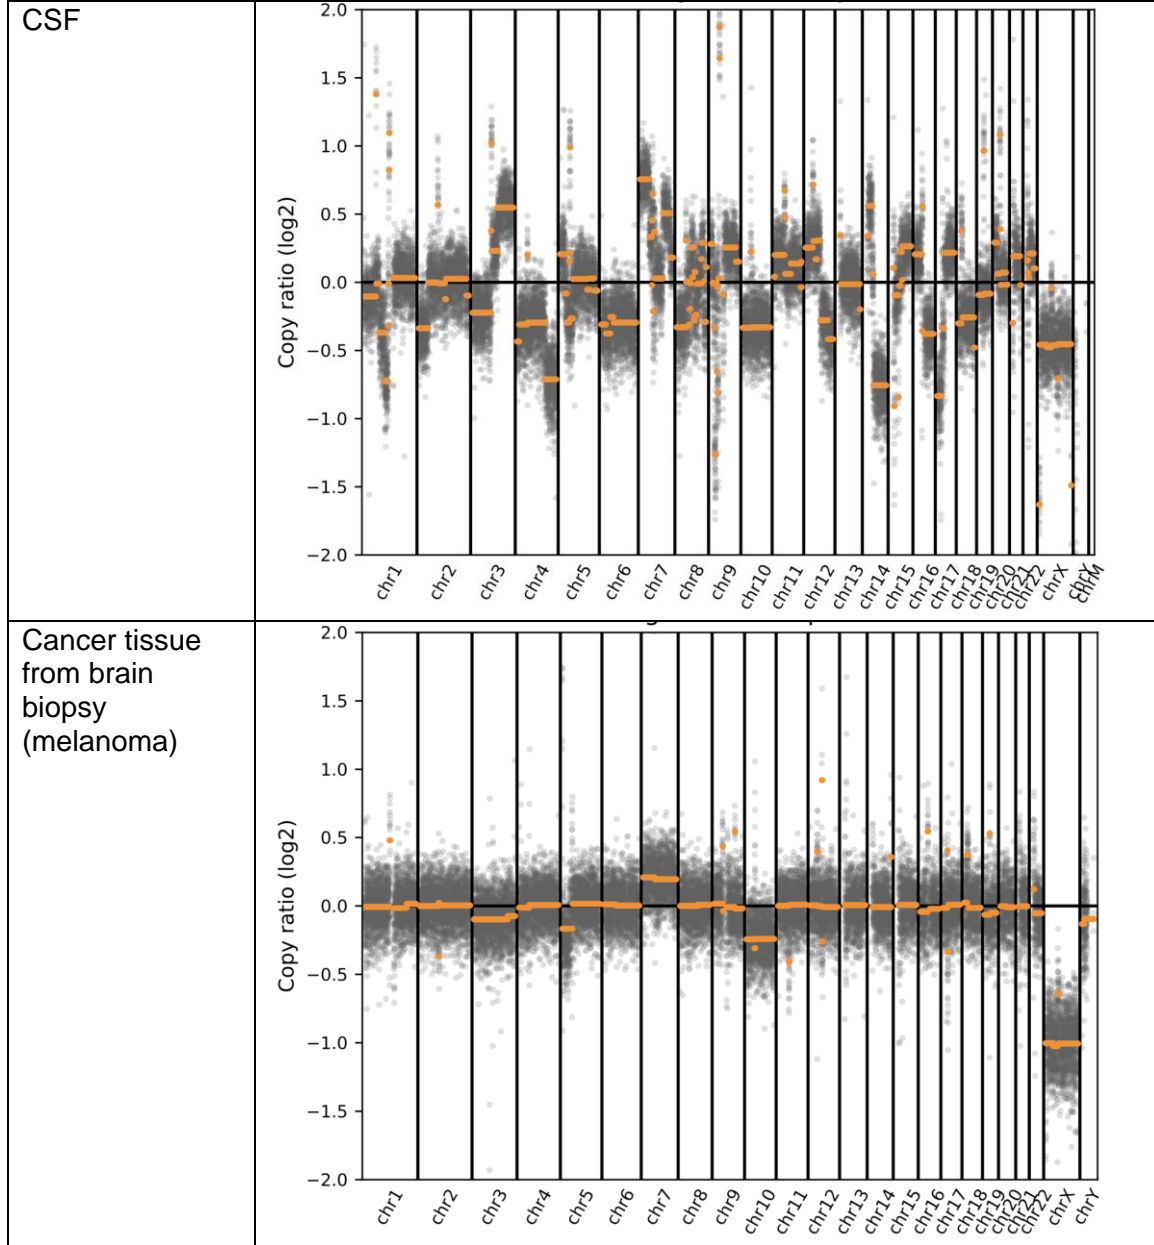

Sample 130

CSF  
(negative by  
mNGS)

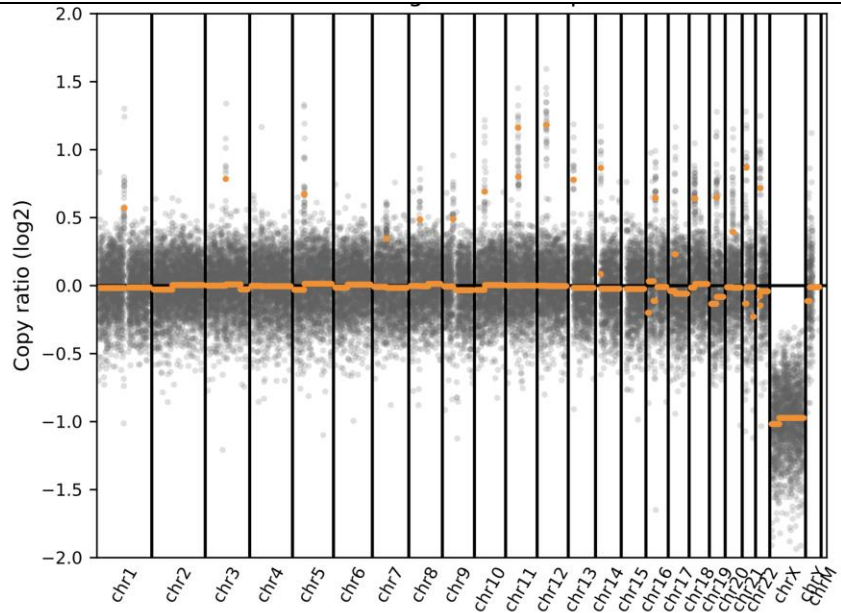

Cancer tissue  
from brain biopsy  
(glioblastoma)

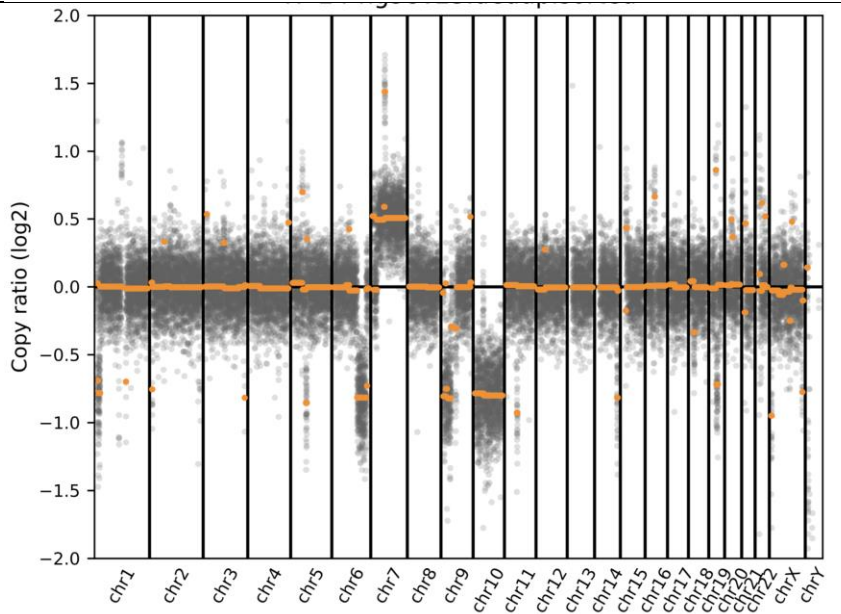

Sample 134  
CSF

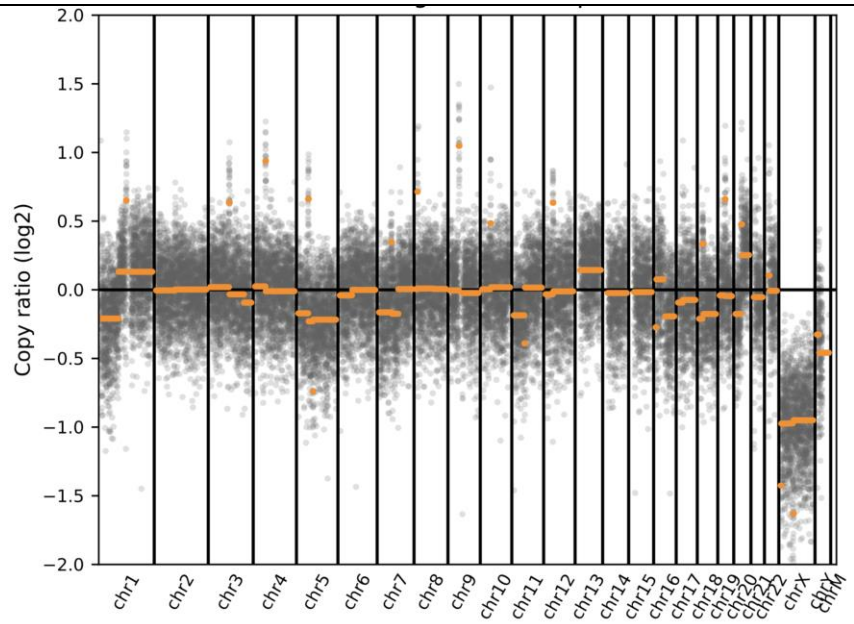

Cancer tissue  
from brain  
biopsy  
(melanoma)

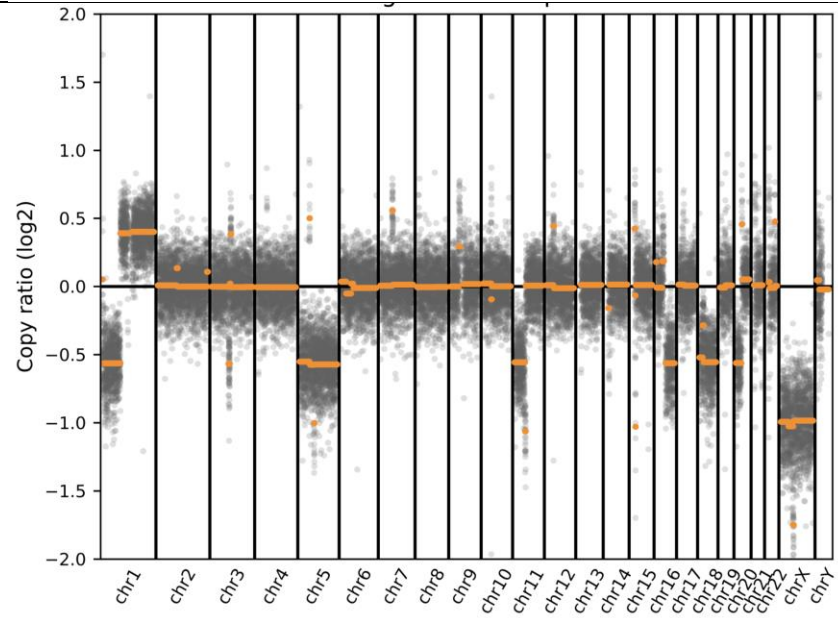

Supplement: jamaneurol-e213088-s001.pdf [file jamaneurol-e213088-s001.pdf]
